# Supplementary material for: Growth Differentiation Factor 15 (GDF-15) Levels Associate with Lower Survival in Chronic Kidney Disease Patients with COVID-19
Source: MDPI journal article supplement (doi:10.3390/biomedicines10123251), 2022-12-14
Supplement: s1 [file s1]

# Growth Differentiation Factor 15 (GDF-15) Levels for Predicting Mortality in Chronic Kidney Disease Patients with Covid-19

Andrea Galassi, Paola Ciceri, Valeria Bono, Lorenza Magagnoli, Matteo Sala, Luisa Artioli, Roberta Rovito, Mohamad Hadla, Vaibhav Yellenki, Antonella d'Arminio Monforte, Camilla Tincati, Mario Cozzolino and Giulia Marchetti

**Table S1.** Association between all biomarkers and eGFR strata, mortality and need for ventilation.

| Molecules                       | eGFR | Mortality | Ventilation |
|---------------------------------|------|-----------|-------------|
| <b>GDF-15</b>                   | *    | ****      | *           |
| <b>CD-25</b>                    | **** | **        | *           |
| <b>RAGE</b>                     | *    | ****      | ***         |
| <b>TNF<math>\alpha</math></b>   | ***  | **        |             |
| <b>TNFR I</b>                   | **** | ***       |             |
| <b>TNFR II</b>                  | **** | **        |             |
| <b>IL-7</b>                     | *    | *         |             |
| <b>LIF</b>                      | ***  | *         |             |
| <b>FAS</b>                      | ***  |           |             |
| <b>YKL-40</b>                   | **   |           |             |
| <b>IL-18</b>                    |      | **        | ***         |
| <b>IL-6</b>                     |      | ***       | **          |
| <b>PTX-3</b>                    |      | ****      |             |
| <b>PDGF-AA</b>                  |      |           |             |
| <b>IL-6R</b>                    |      |           |             |
| <b>VEGF</b>                     |      |           |             |
| <b><math>\alpha</math>1-AGP</b> |      |           |             |
| <b>TRAIL</b>                    |      |           |             |
| <b>Kynurenine</b>               |      |           |             |
| <b>Tryptophane</b>              |      |           |             |

**Caption:** Cytokines levels (as continuous variable) were compared between eGFR strata, survived and deceased patients, and between patients who were and were not treated by non-invasive ventilation. Test for comparison was performed by Mann-Whitney U test (\* $p < 0.05$ , \*\* $p < 0.01$ , \*\*\* $p < 0.001$ , \*\*\*\* $p < 0.0001$ ).

**Legend:**

$\alpha$ 1-AGP: alpha 1-acid glycoprotein

eGFR: estimated glomerular filtration rate

GDF-15: growth and differentiation factor 15

IL-6: interleukine-6

IL-7: interleukin-7

IL-18: interleukin-18

IL-6R: interleukine-6 receptor

LIF: leukemia inhibitory factor

TNF $\alpha$ : tumor necrosis factor alpha

TNFR I: tumor necrosis factor receptor 1

TNFR II: tumor necrosis factor receptor 2

YKL-40PDGF-AA: platelet derived growth factor – AA

PTX-3: pentraxin-3 RAGE: receptor for advanced glycation end products

TRAIL: TNF-related apoptosis- inducing ligand kynurenine and tryptophane

VEGF: vascular endothelial growth factor

**Table S2.** Multivariate Cox regression model for survival predictability in all patients and in subgroups stratified according to eGFR, excluding outliers for GDF-15.

| Outcome: mortality     |                            |          |                       |          |                    |          |
|------------------------|----------------------------|----------|-----------------------|----------|--------------------|----------|
| Variable               | All patients (no outliers) |          | eGFR $\geq$ 45 mL/min |          | eGFR < 45 mL/min   |          |
|                        | HR (95% CI)                | <i>p</i> | HR (95% CI)           | <i>p</i> | HR (95% CI)        | <i>p</i> |
| eGFR < 45 mL/min       | 0,66 (0,29-1,49)           | 0,3196   | -                     | -        | -                  | -        |
| Age $\geq$ 75 y        | 2,96 (1,18-7,42)           | 0,0208   | 2,19 (0,70-6,83)      | 0,1769   | 6,02 (0,90-40,20)  | 0,0637   |
| Fever                  | 3,97 (1,36-11,62)          | 0,0117   | 2,69 (0,59-12,26)     | 0,2001   | 10,52 (1,29-85,44) | 0,0277   |
| Dyspnea                | 1,84 (0,79-4,27)           | 0,1549   | 2,08 (0,70-6,20)      | 0,1877   | 1,88 (0,36-9,97)   | 0,4575   |
| P/F at admission < 300 | 1,54 (0,71-3,35)           | 0,2704   | 1,73 (0,61-4,94)      | 0,3027   | 1,39 (0,36-5,33)   | 0,6356   |
| GDF-15, quartiles      | 2,25 (1,46-3,47)           | 0,0003   | 1,84 (1,07-3,17)      | 0,0281   | 3,68 (1,42-9,51)   | 0,0072   |

**Caption:**

eGFR: estimated glomerular filtration rate

GDF-15: Growth Differentiation Factor 15

P/F: PaO<sub>2</sub>/FiO<sub>2</sub> ratio

Y: years

**Table S3.** Multivariate Cox regression model for survival predictability in all patients and in subgroups stratified according to eGFR, excluding maintenance hemodialysis patients.

| Outcome: mortality     |                      |          |                       |          |                   |          |
|------------------------|----------------------|----------|-----------------------|----------|-------------------|----------|
| Variable               | All patients (no HD) |          | eGFR $\geq$ 45 mL/min |          | eGFR < 45 mL/min  |          |
|                        | HR (95% CI)          | <i>p</i> | HR (95% CI)           | <i>p</i> | HR (95% CI)       | <i>p</i> |
| eGFR < 45 mL/min       | 0,65 (0,31-1,34)     | 0,2388   | -                     | -        | -                 | -        |
| Age $\geq$ 75 y        | 2,31 (0,75-7,09)     | 0,1447   | 2,31 (0,75-7,09)      | 0,1447   | 1,80 (0,49-6,66)  | 0,3804   |
| Fever                  | 3,92 (1,42-10,80)    | 0,0083   | 2,83 (0,63-12,74)     | 0,1753   | 5,03 (1,14-22,27) | 0,0334   |
| Dyspnea                | 1,62 (0,73-3,58)     | 0,2328   | 2,22 (0,76-6,51)      | 0,1464   | 0,80 (0,24-2,67)  | 0,7174   |
| P/F at admission < 300 | 1,70 (0,83-3,44)     | 0,1443   | 1,82 (0,65-5,09)      | 0,2537   | 1,47 (0,51-4,25)  | 0,4808   |
| GDF-15, quartiles      | 2,28 (1,53-3,38)     | 4.49e-05 | 1,99 (1,17-3,39)      | 0,0114   | 2,87 (1,40-5,90)  | 0,0042   |

**Caption:**

eGFR: estimated glomerular filtration rate

GDF-15: Growth Differentiation Factor 15

P/F: PaO<sub>2</sub>/FiO<sub>2</sub> ratio

Y: years
